# Supplementary material for: The influence of drying routes on the properties of anisotropic all-cellulose composite foams from post-consumer cotton clothing
Source: Royal Society of Chemistry journal article supplement (doi:10.1039/d4nr01720j), 2024-01-01
Supplement: d4nr01720j1.pdf [file d4nr01720j1.pdf]

## Supporting information

### The Influence of Drying Routes on the Properties of Anisotropic All-Cellulose Composite Foams from Post-Consumer Cotton Textiles

Carina Schiele<sup>1</sup>, Maria-Ximena Ruiz-Caldas<sup>1</sup>, Tingting Wu<sup>2,3</sup>, Elisabetta Nocerino<sup>1,4</sup>, Agnes Åhl<sup>1</sup>, Aji P. Mathew<sup>1</sup>, Gustav Nyström<sup>2\*</sup>, Lennart Bergström<sup>1,5\*</sup>, Varvara Apostolopoulou-Kalkavoura<sup>1,2\*</sup>

<sup>1</sup>Department of Materials and Environmental Chemistry, Stockholm University, SE-10691 Stockholm, Sweden

<sup>2</sup>Cellulose & Wood Materials Laboratory, Empa, Überlandstrasse 129, CH-8600, Dübendorf, Switzerland.

<sup>3</sup>Institute of Sustainability for Chemicals, Energy and Environment (ISCE<sup>2</sup>), Agency for Science, Technology and Research (A\*STAR), 1 Pesek Road, Jurong Island 627833, Singapore

<sup>4</sup>Laboratory for Neutron Scattering and Imaging, Paul Scherrer Institute (PSI), Villigen, CH-5232 Switzerland

<sup>5</sup>Wallenberg Initiative Materials Science for Sustainability, Department of Materials and Environmental Chemistry, Stockholm University, 114 18 Stockholm, Sweden

\*Corresponding authors: [gustav.nystroem@empa.ch](mailto:gustav.nystroem@empa.ch), [lennart.bergstrom@mmk.su.se](mailto:lennart.bergstrom@mmk.su.se), [varvara.apostolopoulou@mmk.su.se](mailto:varvara.apostolopoulou@mmk.su.se)

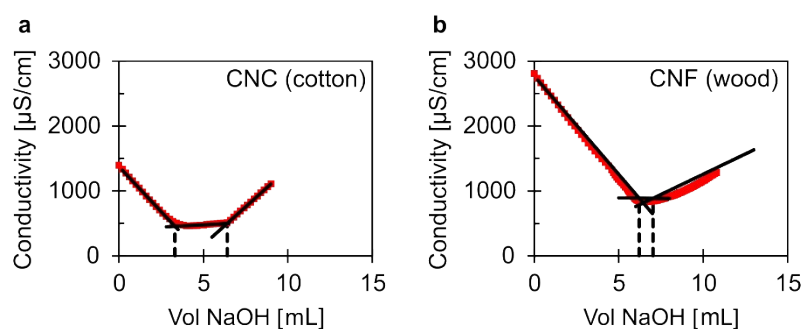

**Figure S 1:** Exemplary conductometric titration curves of (a) cotton textile-derived CNCs and (b) wood-derived CNFs. The flat region corresponds to the titration of carboxylic groups.

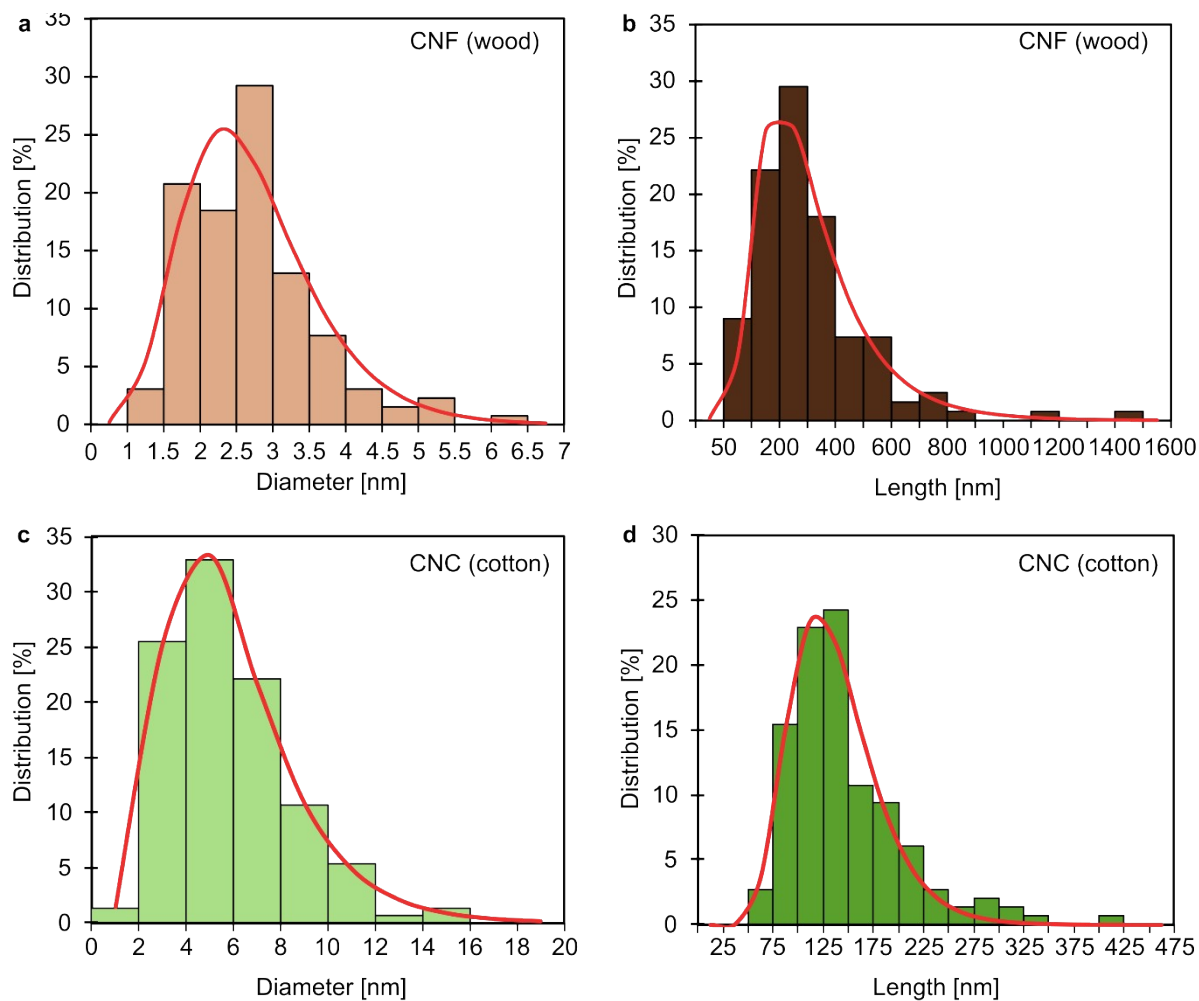

**Figure S 2:** Particle diameter and length distribution of cotton textile-CNCs and wood-CNFs with the fitting of the lognormal distribution.

**Table S 1:** Composition and properties of the foams

| Label           | CNC:CNF ratio | Density at 50% RH<br>[kg m <sup>-3</sup> ] | Porosity<br>[%] | Solid content<br>[wt%] | Drying technique |
|-----------------|---------------|--------------------------------------------|-----------------|------------------------|------------------|
| CNC:CNF-1:1_FD  | 1:1           | 13 ± 0.4                                   | 99              | 1                      | FD               |
| CNC:CNF-5:1_FD  | 5:1           | 34 ± 1.2                                   | 98              | 3                      | FD               |
| CNC:CNF-9:1_FD  | 9:1           | 52 ± 0.8                                   | 96              | 5                      | FD               |
| CNC:CNF-1:1_SCD | 1:1           | 24 ± 1.3                                   | 98              | 1                      | SCD              |
| CNC:CNF-5:1_SCD | 5:1           | 44 ± 1.6                                   | 98              | 3                      | SCD              |
| CNC:CNF-9:1_SCD | 9:1           | 66 ± 1.6                                   | 96              | 5                      | SCD              |

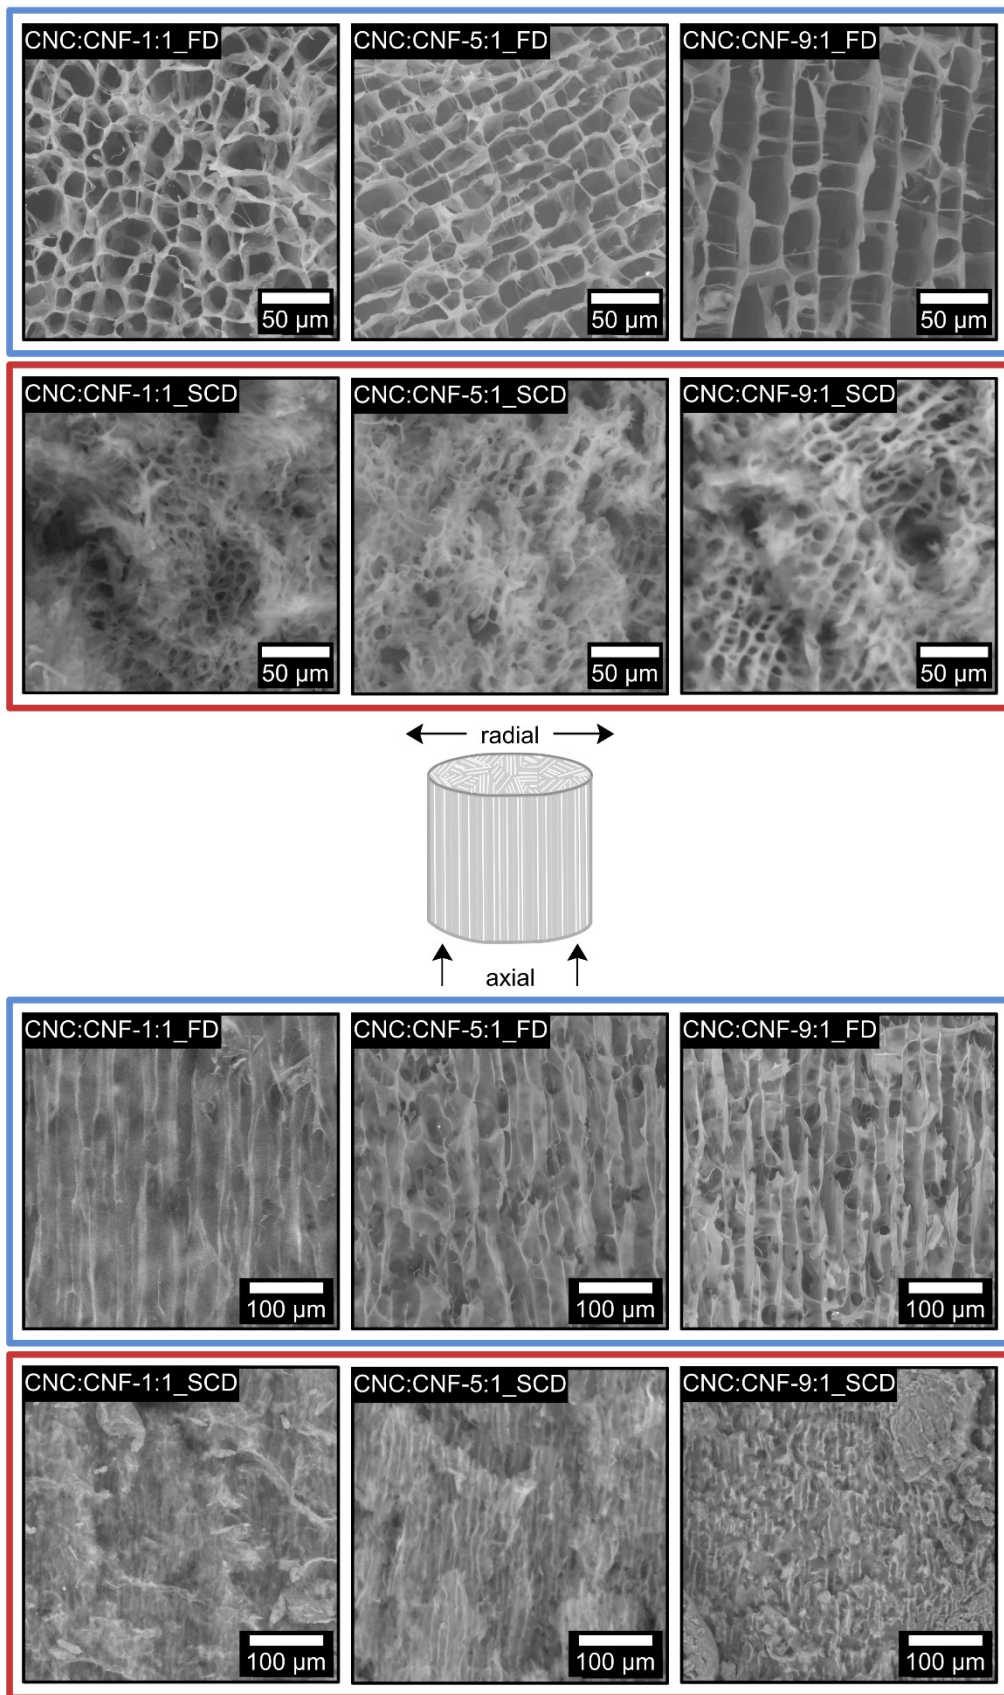

**Figure S 3:** Scanning electron microscopy images of the eight different configurations along the radial (top) and axial (bottom) direction.

**Table S 2:** Properties of the foam pores, surface area and CO<sub>2</sub> adsorption

| Label           | Macropore size<br>[ $\mu\text{m}$ ]<br>via SEM<br>n=120 | Macropore size<br>[ $\mu\text{m}$ ]<br>via Tomography<br>n=120 | Surface area<br>[ $\text{m}^2 \text{g}^{-1}$ ]<br>via BET | Share of<br>macropores<br>( $\geq 300 \text{ nm}$ ) [%] | Share of<br>nanosized pores<br>( $\leq 300 \text{ nm}$ ) [%] | CO <sub>2</sub> adsorption<br>[ $\text{mmol g}^{-1}$ ] |
|-----------------|---------------------------------------------------------|----------------------------------------------------------------|-----------------------------------------------------------|---------------------------------------------------------|--------------------------------------------------------------|--------------------------------------------------------|
| CNC:CNF-1:1_FD  | 28 $\pm$ 8                                              | 19 $\pm$ 4                                                     | 19                                                        | 99.92                                                   | 0.08                                                         | -                                                      |
| CNC:CNF-5:1_FD  | 26 $\pm$ 8                                              | 16 $\pm$ 4                                                     | 8                                                         | 99.92                                                   | 0.08                                                         | -                                                      |
| CNC:CNF-9:1_FD  | 27 $\pm$ 8                                              | 13 $\pm$ 3                                                     | 6                                                         | 99.90                                                   | 0.10                                                         | -                                                      |
| CNC:CNF-1:1_SCD | 9 $\pm$ 2                                               | -                                                              | 234                                                       | 98.76                                                   | 1.24                                                         | -                                                      |
| CNC:CNF-5:1_SCD | 9 $\pm$ 4                                               | 9 $\pm$ 2                                                      | 263                                                       | 97.60                                                   | 2.40                                                         | 0.385                                                  |
| CNC:CNF-9:1_SCD | 10 $\pm$ 3                                              | 15 $\pm$ 3                                                     | 262                                                       | 96.87                                                   | 3.13                                                         | 0.383                                                  |

**Table S 3:** Scale factor C derived from the Porod model at different relative humidity (RH)

| Label           | Scale Factor C<br>( $\times 10^{-6}$ )<br>At 50% RH | Scale Factor C<br>( $\times 10^{-6}$ )<br>At 80% RH |
|-----------------|-----------------------------------------------------|-----------------------------------------------------|
| CNC:CNF-1:1_FD  | 2.53 $\pm$ 0.03                                     | 2.28 $\pm$ 0.03                                     |
| CNC:CNF-5:1_FD  | 1.76 $\pm$ 0.03                                     | 1.60 $\pm$ 0.03                                     |
| CNC:CNF-1:1_SCD | 107 $\pm$ 0.18                                      | 109 $\pm$ 0.35                                      |
| CNC:CNF-5:1_SCD | 347 $\pm$ 0.40                                      | 428 $\pm$ 0.40                                      |

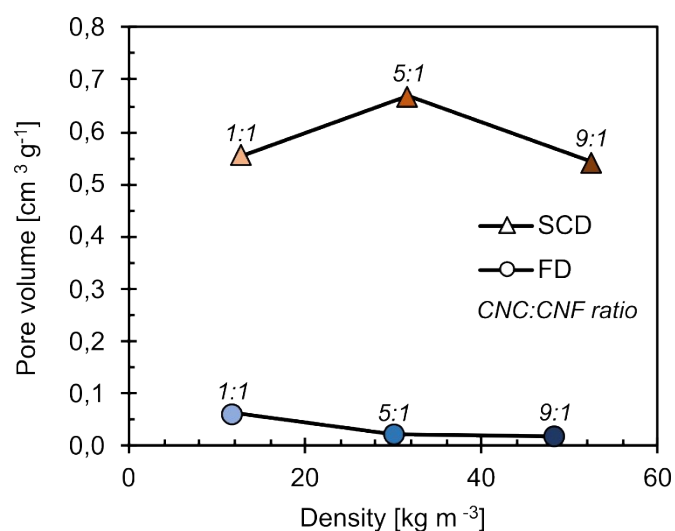**Figure S 4:** Pore volume of pores between 1.7 and 300 nm as estimated from N<sub>2</sub> sorption using the Barrett–Joyner–Halenda (BJH) model.

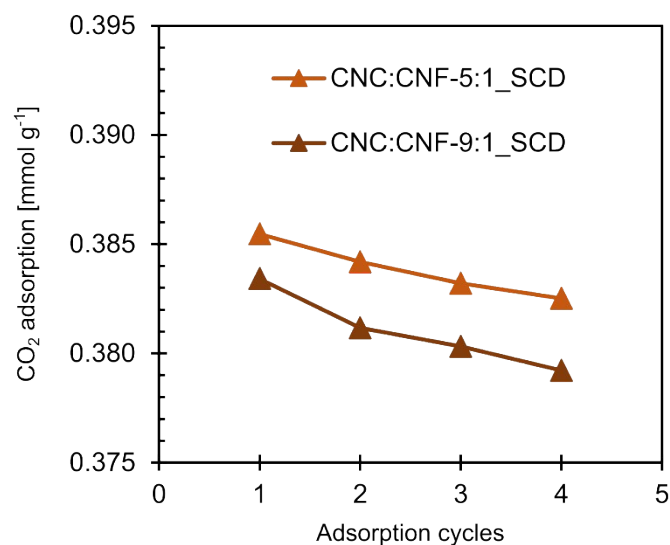

**Figure S 5:** CO<sub>2</sub> adsorption capacity at STP and 0°C of CNC:CNF-5:1\_SCD and CNC:CNF-9:1\_SCD as a function of CO<sub>2</sub> adsorption cycles.

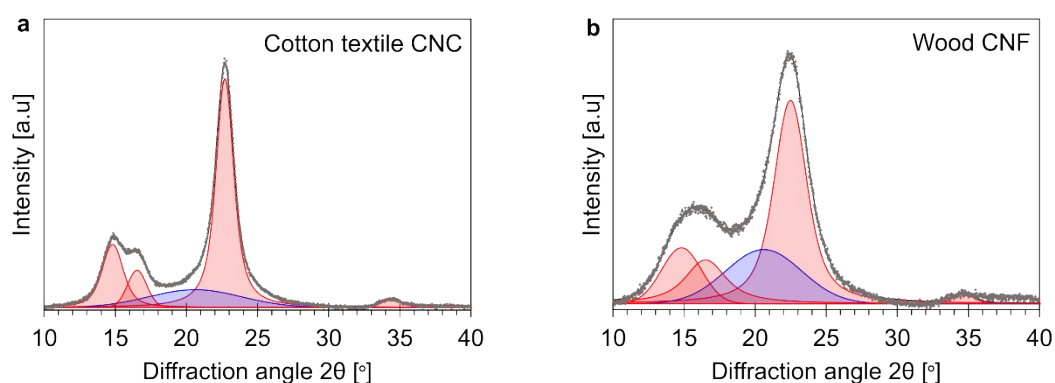

**Figure S 6:** XRD profiles of (a) cotton textile CNCs and (b) wood CNFs. The dotted curve corresponds to the experimental data. The black line is the fitted model, the red curves are the crystalline peaks, and the blue curve is the amorphous peak. The crystallinity indexes derived from these figures are stated in Table S2.

**Table S 4:** Crystallinity index (CI) of cotton textile CNCs and wood CNFs

| Label              | CI deconvolution [%] | CI Segal [%] |
|--------------------|----------------------|--------------|
| Cotton textile CNC | 83                   | 92           |
| Wood CNF           | 77                   | 78           |

**Table S 5:** Orientation degree for the foam walls and the particles

| Label           | Macropore alignment<br>SEM + OrientationJ<br>n=3 | Particle alignment<br>50%RH<br>SAXS | Particle alignment<br>80%RH<br>SAXS | Particle alignment<br>WAXS<br>n=3 |
|-----------------|--------------------------------------------------|-------------------------------------|-------------------------------------|-----------------------------------|
| CNC:CNF-1:1_FD  | 0.93 ± 0.01                                      | 0.92                                | 0.92                                | 0.70 ± 0.01                       |
| CNC:CNF-5:1_FD  | 0.91 ± 0.01                                      | 0.89                                | 0.91                                | 0.62 ± 0.02                       |
| CNC:CNF-9:1_FD  | 0.92 ± 0.01                                      | -                                   | -                                   | 0.71 ± 0.02                       |
| CNC:CNF-1:1_SCD | 0.85 ± 0.02                                      | -                                   | -                                   | -                                 |
| CNC:CNF-5:1_SCD | 0.88 ± 0.02                                      | -                                   | -                                   | -                                 |
| CNC:CNF-9:1_SCD | 0.78 ± 0.04                                      | -                                   | -                                   | -                                 |

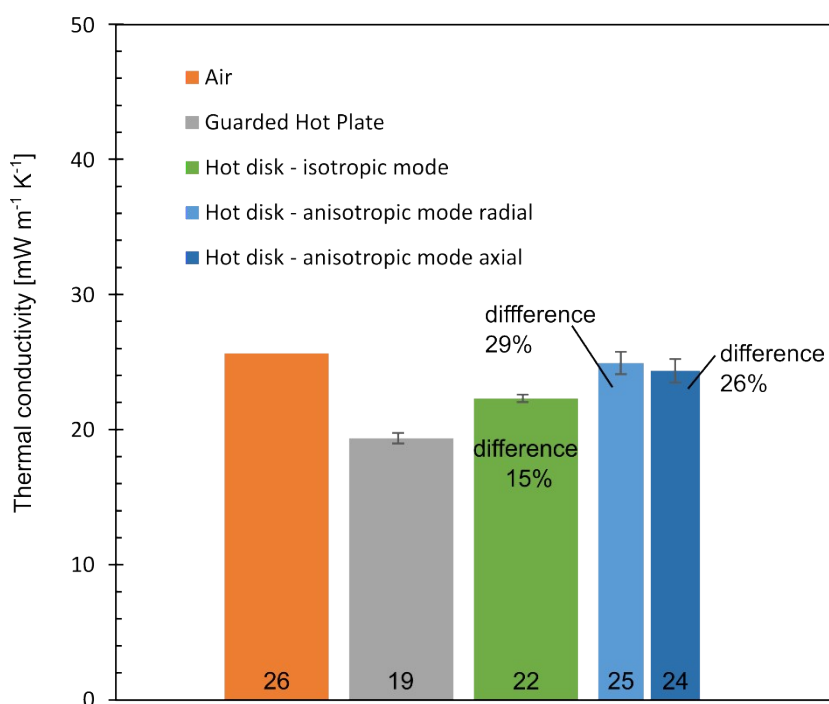

**Figure S 7:** Thermal conductivity of a super-insulating reference material (PU aerogel) measured with the Hot disk in isotropic and anisotropic mode compared to a reference measurement on the Guarded Hot Plate apparatus.

**Table S 6:** Mechanical properties of the foams

| Label           | Young's Modulus<br>[kPa]<br><br>n=5 | Specific Young's<br>Modulus<br>[kNm kg <sup>-1</sup> ]<br><br>n=5 | Toughness<br>[kJ m <sup>-3</sup> ]<br><br>n=5 | Specific Toughness<br>[kJ kg <sup>-1</sup> ]<br><br>n=5 |
|-----------------|-------------------------------------|-------------------------------------------------------------------|-----------------------------------------------|---------------------------------------------------------|
| CNC:CNF-1:1_FD  | 440 ± 140                           | 35 ± 10                                                           | 210 ± 70                                      | 17 ± 5                                                  |
| CNC:CNF-5:1_FD  | 2600 ± 550                          | 76 ± 17                                                           | 1600 ± 300                                    | 48 ± 8                                                  |
| CNC:CNF-9:1_FD  | 4200 ± 400                          | 81 ± 8                                                            | 2100 ± 780                                    | 41 ± 15                                                 |
| CNC:CNF-1:1_SCD | 330 ± 57                            | 14 ± 2                                                            | 340 ± 160                                     | 14 ± 6                                                  |
| CNC:CNF-5:1_SCD | 560 ± 120                           | 13 ± 2                                                            | 280 ± 74                                      | 6 ± 2                                                   |
| CNC:CNF-9:1_SCD | 950 ± 180                           | 14 ± 3                                                            | 330 ± 120                                     | 5 ± 2                                                   |

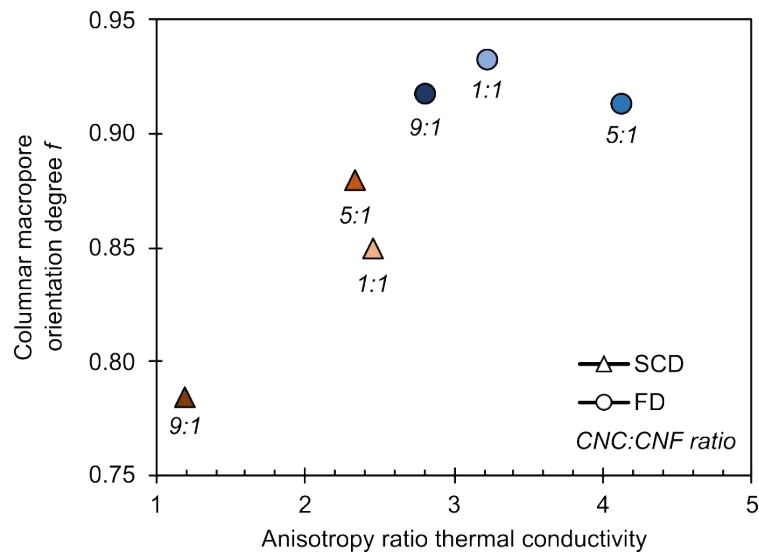

**Figure S 8:** Orientation degree  $f$  of the columnar macropores as a function of the anisotropy ratio of the thermal conductivity.
